# Supplementary material for: Improved high‐throughput MHC typing for non‐model species using long‐read sequencing
Source: PubMed Central journal article supplement — Mol Ecol Resour. 2021 Oct 6;22(3):862–76. doi: 10.1111/1755-0998.13511 (PMC9293008; doi:10.1111/1755-0998.13511), 2021-10-06
Supplement: MEN-22-862-s001.pdf [file MEN-22-862-s001.pdf]

## Supplementary Data 2. Limited resolution of SSCP method

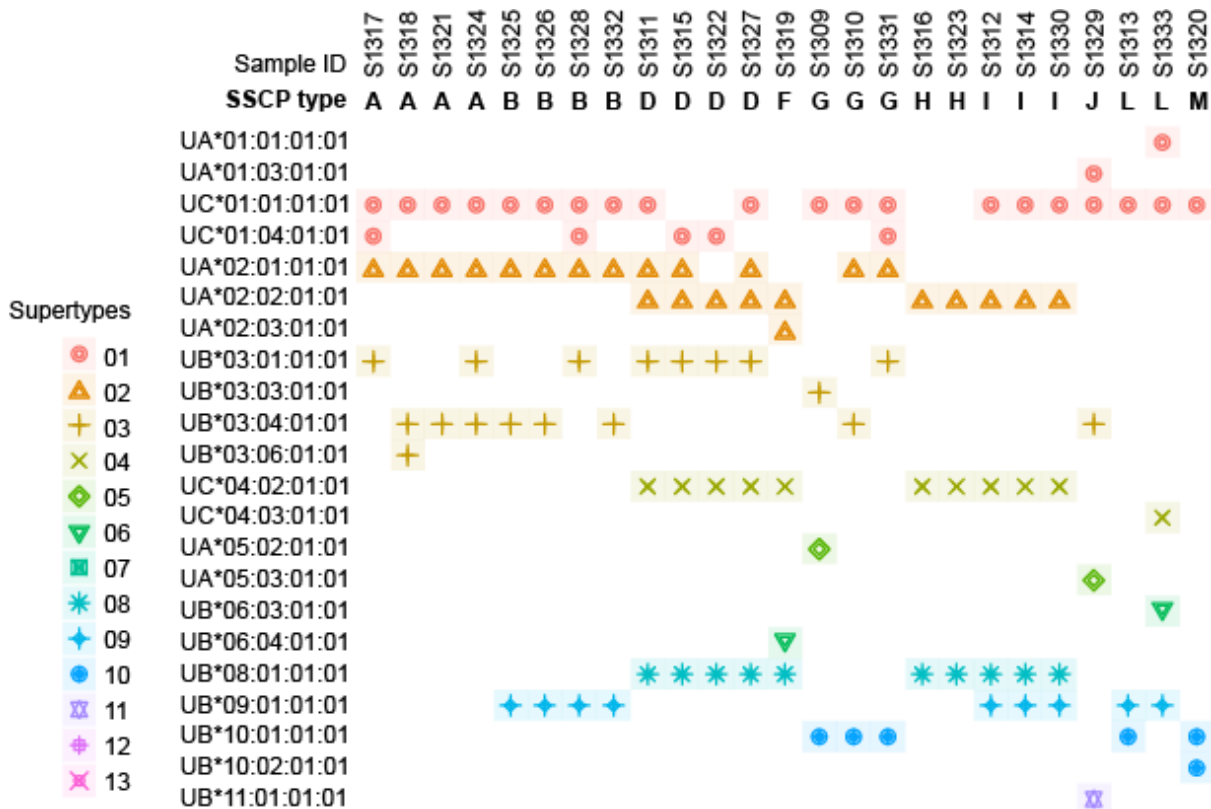

Each column in the table represents an individual Tasmanian devil with SSCP type and MHC-I alleles shown. Before the development of the new method described in this paper, previous genotyping efforts in the Tasmanian devil were mainly based on amplicon cloning and Sanger sequencing, which is a laborious, time-consuming, and costly method. As an alternative, the single-strand conformation polymorphism (SSCP) analysis, which is still a relatively common method for MHC typing in non-model species nowadays, was used as a trade-off for simplicity and suitability for population-scale surveys. In this study, we analysed 25 Tasmanian devils representing 10 different SSCP patterns<sup>1</sup>. While the SSCP method appeared to provide high consistency with different SSCP types indicating different MHC genotypes, it was insufficient for differentiating certain MHC variants, especially those within the same supertype groups, which resulted in some animals with different genotypes sharing the same SSCP type.

### Supplementary Data 3. PacBio read statistics

|                                           | Total         | SMRTcell_1 | SMRTcell_2 | SMRTcell_3 | SMRTcell_4 |
|-------------------------------------------|---------------|------------|------------|------------|------------|
| <b>Number of polymerase reads</b>         | 1,989,412     | 496,556    | 510,674    | 473,285    | 508,897    |
| <b>Avg. polymerase read length (bp)</b>   | 35,912        | 37,456     | 36,928     | 35,571     | 33,703     |
| <b>Number of subreads</b>                 | 49,125,512    | 12,735,113 | 12,843,178 | 11,669,501 | 11,877,720 |
| <b>Avg. subread length (bp)</b>           | 1,413         | 1,419      | 1,427      | 1,401      | 1,403      |
| <b>Number of stranded CCS reads</b>       | 1,910,014     | 492,646    | 498,965    | 453,530    | 464,873    |
| <b>Number of reads per sample</b>         | 3,868 ± 1,086 |            |            |            |            |
| <b>Number of refined reads per sample</b> | 3,850 ± 1,085 |            |            |            |            |
| <b>Number of aligned reads per sample</b> | 3,846 ± 1,082 |            |            |            |            |

## Supplementary Data 4. PCR chimera analysis

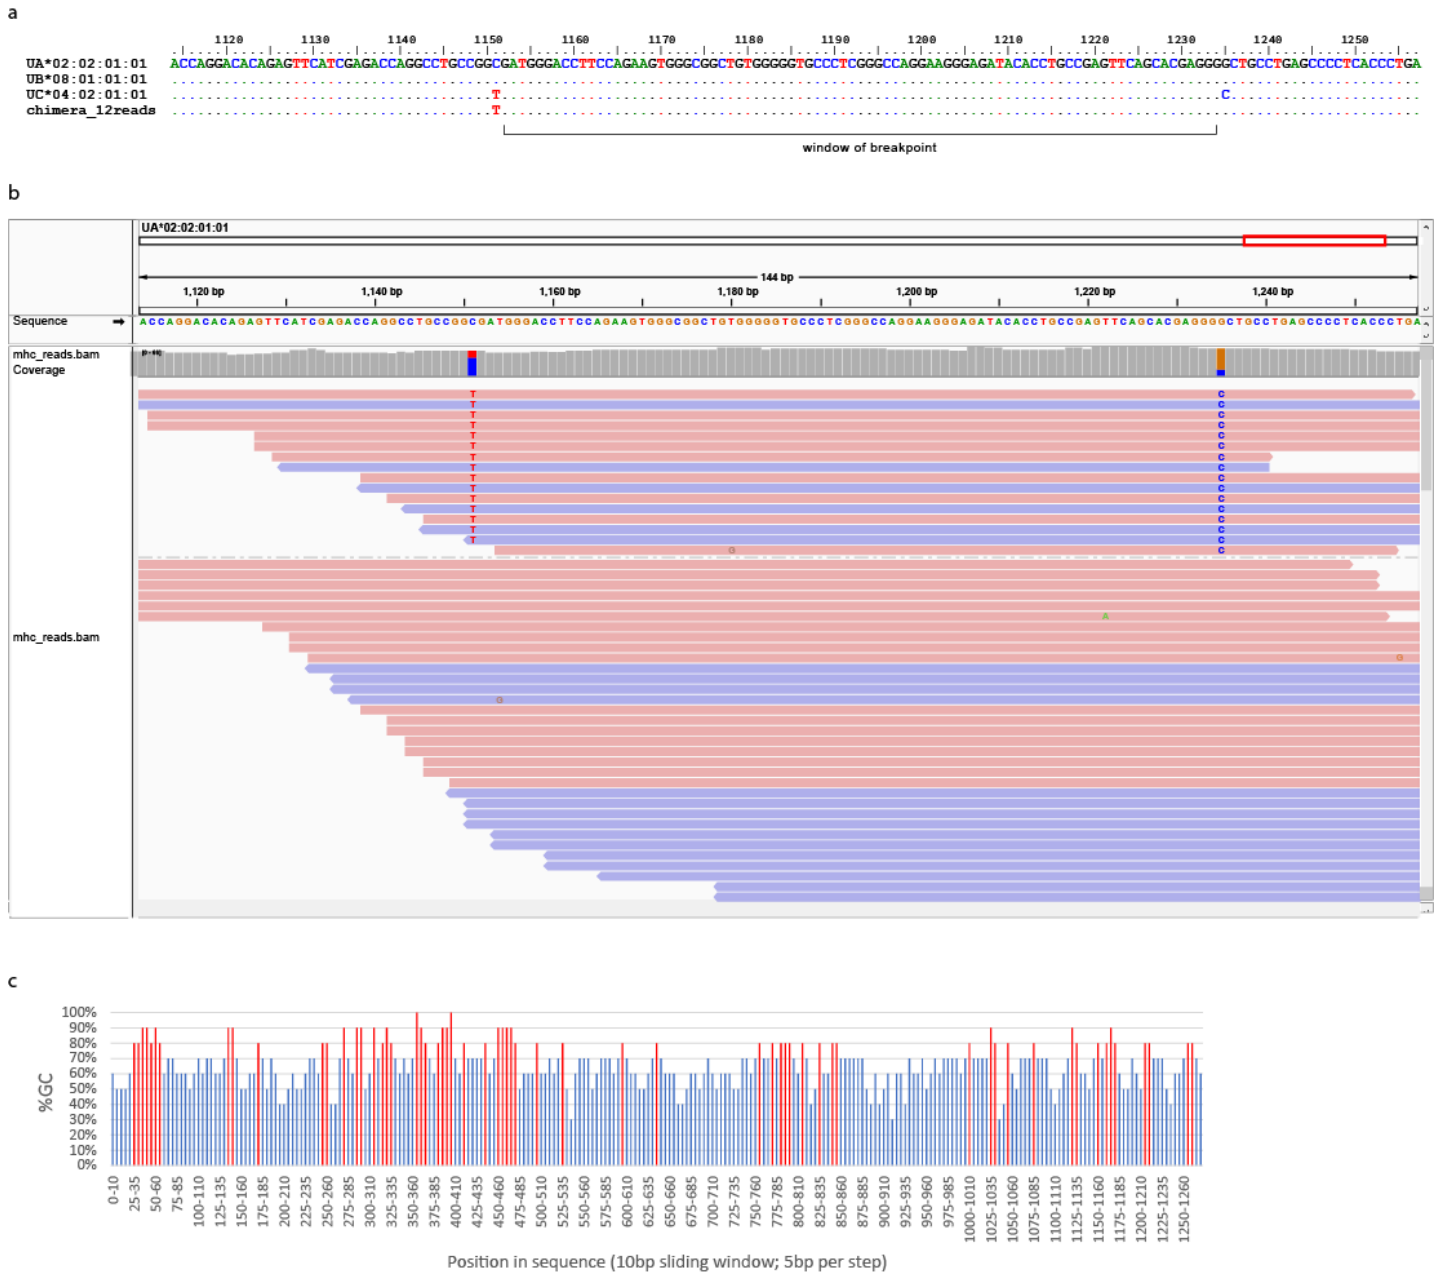

SD4\_Fig1. Analysis of MHC PCR chimera formation in a Tasmanian devil. a) Partial sequence alignment of three MHC-I alleles and one recurring chimeric variant, with the region of chimera formation shown; b) Whole genome sequencing reads aligned to the region of chimera formation, as visualised in IGV; c) GC content distribution in devil MHC-I gene, with %GC greater than 80% highlighted in red.

It has been observed in bacterial 16S rRNA gene amplicons that PCR chimeras can reproducibly form among independent PCR amplifications<sup>2</sup>. To investigate if this can occur in MHC gene amplicons, we genotyped one Tasmanian devil (Maria Island; microchip number 982000123209291) whose genome had been sequenced for another study (unpublished data). Two independent PCR amplifications were carried out, one using Phusion Hot Start II High Fidelity PCR Master Mix (Thermo Scientific) and the other using Platinum SuperFi II PCR Master Mix (Invitrogen), both with 20 PCR cycles performed. The generated amplicons were sequenced and data analysed using the methods described in the main article.

Both sets of sequencing data suggested that the individual has three MHC-I alleles, including UA\*02:02:01:01, UB\*08:01:01:01, and UC\*04:02:01:01. One putative chimeric sequence variant, which appears to be a combination of UC\*04:02:01:01 and either of the other two alleles (SD4\_Fig1a), was found in both results supported by 12 reads and five reads, respectively. Based on whole genome resequencing data generated with Illumina sequencing, this chimeric sequence variant, which contains a nucleotide T at sequence position 1151 and G at 1235, does not exist in the genome of this individual (SD4\_Fig1b). This result along with the low read counts suggest that this sequence variant is a technical artefact, which formed repeatedly in independent PCR amplifications carried out using different kits. One possible cause of this issue is the high abundance of GC-rich regions in the target MHC genes (SD4\_Fig1c). High GC content in PCR templates can adversely affect the efficiency and success rate of amplification due to increased regional secondary structure formation. Although both PCR kits that were used are designed to improve the amplification of templates with high GC content, the GC-rich regions within the target genes may still increase the chance of generating partial amplicons, which will facilitate the formation of recurring chimeric artefacts.

These results demonstrate that the identification of a sequence variant in multiple samples or PCR amplifications is not a sufficient criterion for MHC allele calling, and that a stringent chimera removal strategy is needed during MHC amplicon data processing.

## Supplementary Data 5. Nucleotide sequences of 61 Tasmanian devil MHC-I alleles

>UA\*01:01:01:01

GCTCTCACTCCTTGAGGTAAGTACTTCGACACCCGCGTGTCCCGGCCCGGGCTCGGGGAGCCGCGGTTCTCTCCGTGGGCTACGTGGACGATCAGCAGTTCTGTCGCTTCGACAGCGACAGCGCGAGTCAGAGTGAAGAGCCGCGGGCGCGGTGGATGGAGAAGGTGAAG  
GACGTGGACCCGGGATACTGGGAGCGGAACACACAGATCAGTAAGGAGAACGCACAGAGTTCCCGAGTGAGCCTGCAGACCTGCGCGGCTACTACAACAGAGCGAGGGCGGTGAGTGACGGGCCGGGTCTACTAAGCCGGTTCGCCCCATCCCCGCTCCCTG  
CGGATCCCACTGAGGGAGGATCCCCCCCCGAGGCGGCGGAAGTCTCCGGGCCCTCCCGGGCGGGCGGTCTCAGGGTCAGCCCTGAGGGGCGAGGGCTCAGGGGCTGACTCTGGGGTGGGGGCGGGCGAGGGGCCACACCTTCCAGCGCATGTACGGCT  
GCGAGGTTTCCCGGAGCTCTCCTCCAGCGCGGTTTCTTCAGTTCCGCTACGACGGGAGGACTACATCGCCCTGGACACGGAGACCCTCAGTGGACGGCTGCGCAGAACGAGGCGAGTGAACACGAAGCGCAAGTGGGAGCGGAGAGGAGCTATGCGGAGAG  
AGATAAAGCCTACCTGGAGGAAACGTGCGTGTGTGGGTGCAGAAGTACCTGGAGATGGGGAAGGAGAGTCTGCAGAGGGCAGGTACCTCCAGGCAGCCCCAGTGCCTCGGCACTCCAGGCCAGCCTCCCCCTCCACCTCCCTGCCCCATTATTCGAGCTCC  
CCATTCCAGGCACCCGAGGACCTCAGGCCGGATCACGCCGTGTACCCCTTTCCCTCTCTGACCTTATGACCTGAAGAACAAGGGGGTAAAGGGCAAGCCTGGAAGGCCTTGACCTTTGCCCCAGATGCCCTTTGCCCCGAGTGACCCGTACAGCACGCC  
AGTGGGGAGGTGACCTGCGAGTCCCGGGCCAGGACTTTTACCCTCGGAGATCTCTGCGCTGGCTGAGGGACGGGAGGAGCAGCACCAGGACACAGAGTTTCATCGAGACCAGGCCTGCCGGTATGGGACCTTCCAGAAGTGGGCGGCTGTGGGGTGCCT  
CGGGCCAGGAAGGGAGATACACCTGCCGAGTTCAGCACGAGGGCTGCCTGAGCCCTCACCTGAAATGGGGTAAACACCGTGAGGAGGGGTGGGGGATTCCACCTCC

>UA\*01:02:01:01

GCTCTCACTCCTTGAGGTAAGTACTTCGACACCCGCGTGTCCCGGCCCGGGCTCGGGGAGCCGCGGTTCTCTCCGTGGGCTACGTGGACGATCAGCAGTTCTGTCGCTTCGACAGCGACAGCGCGAGTCAGAGTGAAGAGCCGCGGGCGCGGTGGATGGAGAAGGTGAAG  
GACGTGGACCCGGGATACTGGGAGCGGAACACACAGATCAGTAAGGAGAACGCACAGAGTTCCCGAGTGAGCCTGCAGAACCTGCGCGGCTACTACAACAGAGCGAGGGCGGTGAGTGACGGGCCGGGTCTACTAAGCCGGTTCGCCCCATCCCCGCTCCCTG  
CGGGTCCCACTGAGGGAGGATCCCCCCCCGAGGCGGCGGAAGTCTCCGGGCCCTCCCGGGCGGGCGGTCTCAGGGTCAGCCCTGAGGGGCGAGGGCTCAGGGGCTGACTCTGGGGTGGGGGCGGGCGAGGGGCCACACCTTCCAGCGCATGTACGGCT  
CGAGGTTTCCCGGAGCTCTCCTCCAGCGCGGTTTCTTCAGTTCCGCTACGACGGGAGGACTACATCGCCCTGGACACGGAGACCCTCAGTGGACGGCTGCGCAGAACGAGGCGAGTGAACACGAAGCGCAAGTGGGAGCGGAGAGGAGCTATGCGGAGAGA  
GATAAAGCCTACCTGGAGGAAACGTGCGTGTGTGGGTGCAGAAGTACCTGGAGATGGGGAAGGAGAGTCTGCAGAGGGCAGGTACCTCCAGGCAGCCCCAGTGCCTCGGCACTCCAGGCCAGCCTCCCCCTCCACCTCCCTGCCCCATTATTCGAGCTCC  
CATTCCAGGCACCCGAGGACCTCAGGGCCTGGATCGCACCGTGTACCCCTTTCCCTCTCTGACCTTATGACCTGAAGAACAAGGGGGTAAAGGGCAAGCCTGGAAGGCCTTGACCTTTGCCCCAGATGCCCTTTGCCCCGAGTGACCCGGCACAGCACGCC  
AGTGGGGAGGTGACCTGCGAGTCCCGGGCCAGGACTTTTACCCTCGGAGATCTCTGCGCTGGCTGAGGGACGGGAGGAGCAGCACCAGGACACAGAGTTTCATCGAGACCAGGCCTGCCGGTATGGGACCTTCCAGAAGTGGGCGGCTGTGGGGTGCCT  
CGGGCCAGGAAGGGAGATACACCTGCCGAGTTCAGCACGAGGGCTGCCTGAGCCCTCACCTGAAATGGGGTAAACACCGTGAGGAGGGGTGGGGGATTCCACCTCC

>UA\*01:02:02:01

GCTCTCACTCCTTGAGGTAAGTACTTCGACACCCGCGTGTCCCGGCCCGGGCTCGGGGAGCCGCGGTTCTCTCCGTGGGCTACGTGGACGATCAGCAGTTCTGTCGCTTCGACAGCGACAGCGCGAGTCAGAGTGAAGAGCCGCGGGCGCGGTGGATGGAGAAGGTGAAG  
GACGTGGACCCGGGATACTGGGAGCGGAACACACAGATCAGTAAGGAGAACGCACAGAGTTCCCGAGTGAGCCTGCAGAACCTGCGCGGCTACTACAACAGAGCGAGGGCGGTGAGTGACGGGCCGGGTCTACTAAGCCGGTTCGCCCCATCCCCGCTCCCTG  
CGGATCCCACTGAGGGAGGATCCCCCCCCGAGGCGGCGGAAGTCTCCGGGCCCTCCCGGGCGGGCGGTCTCAGGGTCAGCCCTGAGGGGCGAGGGCTCAGGGGCTGACTCTGGGGTGGGGGCGGGCGAGGGGCCACACCTTCCAGCGCATGTACGGCT  
GCGAGGTTTCCCGGAGCTCTCCTCCAGCGCGGTTTCTTCAGTTCCGCTACGACGGGAGGACTACATCGCCCTGGACACGGAGACCCTCAGTGGACGGCTGCGCAGAACGAGGCGAGTGAACACGAAGCGCAAGTGGGAGCGGAGAGGAGCTATGCGGAGAG  
AGATAAAGCCTACCTGGAGGAAACGTGCGTGTGTGGGTGCAGAAGTACCTGGAGATGGGGAAGGAGAGTCTGCAGAGGGCAGGTACCTCCAGGCAGCCCCAGTGCCTCGGCACTCCAGGCCAGCCTCCCCCTCCACCTCCCTGCCCCATTATTCGAGCTCC  
CCATTCCAGGCACCCGAGGACCTCAGGCCGGATCACGCCGTGTACCCCTTTCCCTCTCTGACCTTATGACCTGAAGAACAAGGGGGTAAAGGGCAAGCCTGGAAGGCCTTGACCTTTGCCCCAGATGCCCTTTGCCCCGAGTGACCCGTACAGCACGCC  
AGTGGGGAGGTGACCTGCGAGTCCCGGGCCAGGACTTTTACCCTCGGAGATCTCTGCGCTGGCTGAGGGACGGGAGGAGCAGCACCAGGACACAGAGTTTCATCGAGACCAGGCCTGCCGGTATGGGACCTTCCAGAAGTGGGCGGCTGTGGGGTGCCT  
CGGGCCAGGAAGGGAGATACACCTGCCGAGTTCAGCACGAGGGCTGCCTGAGCCCTCACCTGAAATGGGGTAAACACCGTGAGGAGGGGTGGGGGATTCCACCTCC

>UA\*01:03:01:01

GCTCTCACTCCTTGAGGTAAGTACTTCGACACCCGCGTGTCCCGGCCCGGGCTCGGGGAGCCGCGGTTCTCTCCGTGGGCTACGTGGACGATCAGCAGTTCTGTCGCTTCGACAGCGACAGCGCGAGTCAGAGTGAAGAGCCGCGGGCGCGGTGGATGGAGAAGGTGAAG  
GACGTGGACCCGGGATACTGGGAGCAGGAGACACAGATCAGTAAGGAGAACGCACAGAGTTCCCGAGTGAGCCTGCAGAACCTGCGCGGCTACTACAACAGAGCGAGGGCGGTGAGTGACGGGCCGGGTCTACTAAGCCGGTTCGCCCCATCCCCGCTCCCTG  
CGGATCCCACTGAGGGAGGATCCCCCCCCGAGGCGGCGGAAGTCTCCGGGCCCTCCCGGGCGGGCGGTCTCAGGGTCAGCCCTGAGGGGCGAGGGCTCAGGGGCTGACTCTGGGGTGGGGGCGGGCGAGGGGCCACACCTTCCAGCGCATGTACGGCT  
GCGAGGTTTCCCGGAGCTCTCCTCCAGCGCGGTTTCTTCAGTTCCGCTACGACGGGAGGACTACATCGCCCTGGACACGGAGACCCTCAGTGGACGGCTGCGCAGAACGAGGCGAGTGAACACGAAGCGCAAGTGGGAGCGGAGAGGAGCTATGCGGAGAG  
AGATAAAGCCTACCTGGAGGAAACGTGCGTGTGTGGGTGAAGAAGTACCTGGAGATGGGGAAGGAGAGTCTGCAGAGGGCAGGTACCTCCAGGCAGCCCCAGTGCCTCGGCACTCCAGGCCAGCCTCCCCCTCCACCTCCCTGCCCCATTATTCGAGCTCC  
CCATTCCAGGCACCCGAGGACCTCAGGCCGGATCACGCCGTGTACCCCTTTCCCTCTCTGACCTTATGACCTGAAGAACAAGGGGGTAAAGGGCAAGCCTGGAAGGCCTTGACCTTTGCCCCAGATGCCCTTTGCCCCGAGTGACCCGTACAGCACGCC  
AGTGGGGAGGTGACCTGCGAGTCCCGGGCCAGGACTTTTACCCTCGGAGATCTCTGCGCTGGCTGAGGGACGGGAGGAGCAGCACCAGGACACAGAGTTTCATCGAGACCAGGCCTGCCGGTATGGGACCTTCCAGAAGTGGGCGGCTGTGGGGTGCCT  
CGGGCCAGGAAGGGAGATACACCTGCCGAGTTCAGCACGAGGGCTGCCTGAGCCCTCACCTGAAATGGGGTAAACACCGTGAGGAGGGGTGGGGGATTCCACCTCC

>UA\*01:05:01:01

GCTCTCACTCCTTGAGGTAAGTACTTCGACACCCGCGTGTCCCGGCCCGGGCTCGGGGAGCCGCGGTTCTCTCCGTGGGCTACGTGGACGATCAGCAGTTCTGTCGCTTCGACAGCGACAGCGCGAGTCAGAGTGAAGAGCCGCGGGCGCGGTGGATGGAGAAGGTGAAG  
GACGTGGACCCGGGATACTGGGAGCGGAACACACAGATCAGTAAGGAGAACGCACAGAGTTCCCGAGTGAGCCTGCAGAACCTGCGCGGCTACTACAACAGAGCGAGGGCGGTGAGTGACGGGCCGGGTCTACTAAGCCGGTTCGCCCCATCCCCGCTCCCTG  
CGGATCCCACTGAGGGAGGATCCCCCCCCGAGGCGGCGGAAGTCTCCGGGCCCTCCCGGGCGGGCGGTCTCAGGGTCAGCCCTGAGGGGCGAGGGCTCAGGGGCTGACTCTGGGGTGGGGGCGGGCGAGGGGCCACACCTTCCAGCGCATGTACGGCT  
GCGAGGTTTCCCGGAGCTCTCCTCCAGCGCGGTTTCTTCAGTTCCGCTACGACGGGAGGACTACATCGCCCTGGACACGGAGACCCTCAGTGGACGGCTGCGCAGAACGAGGCGAGTGAACACGAAGCGCAAGTGGGAGCGGAGAGGAGCTATGCGGAGAG  
AGATAAAGCCTACCTGGAGGAAACGTGCGTGTGTGGGTGAAGAAGTACCTGGAGATGGGGAAGGAGAGTCTGCAGAGGGCAGGTACCTCCAGGCAGCCCCAGTGCCTCGGCACTCCAGGCCAGCCTCCCCCTCCACCTCCCTGCCCCATTATTCGAGCTCC  
CCATTCCAGGCACCCGAGGACCTCAGGCCGGATCACGCCGTGTACCCCTTTCCCTCTCTGACCTTATGACCTGAAGAACAAGGGGGTAAAGGGCAAGCCTGGAAGGCCTTGACCTTTGCCCCAGATGCCCTTTGCCCCGAGTGACCCGTACAGCACGCC  
AGTGGGGAGGTGACCTGCGAGTCCCGGGCCAGGACTTTTACCCTCGGAGATCTCTGCGCTGGCTGAGGGACGGGAGGAGCAGCACCAGGACACAGAGTTTCATCGAGACCAGGCCTGCCGGTATGGGACCTTCCAGAAGTGGGCGGCTGTGGGGTGCCT  
CGGGCCAGGAAGGGAGATACACCTGCCGAGTTCAGCACGAGGGCTGCCTGAGCCCTCACCTGAAATGGGGTAAACACCGTGAGGAGGGGTGGGGGATTCCACCTCC























## Supplementary Data 6. Phylogenetic relationships among Tasmanian devil MHC-I alleles

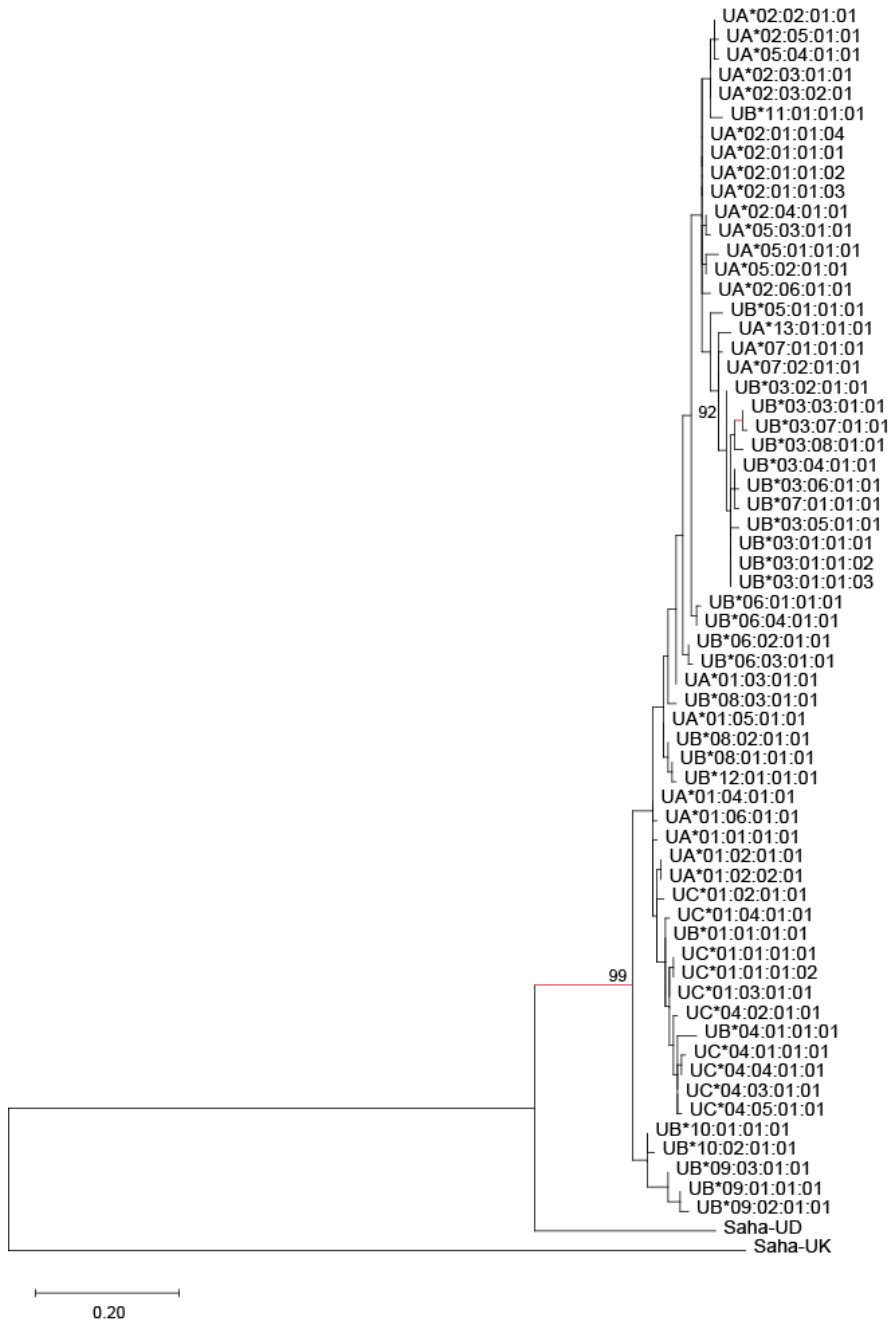

The evolutionary history among the Tasmanian devil MHC-I alleles was inferred based on amino acid sequences using the Maximum Likelihood method and Whelan And Goldman model<sup>3</sup> in MEGA X<sup>4</sup>. The tree with the highest log likelihood (-2192.52) is shown. A discrete Gamma distribution was used to model evolutionary rate differences among sites (5 categories (+G, parameter = 0.3083)). The rate variation model allowed for some sites to be evolutionarily invariable ([+I], 30.40% sites). The tree is drawn to scale, with branch lengths measured in the number of substitutions per site. Two non-classical MHC-I genes, *Saha-UK* and *Saha-UD*, were included for rooting the tree. The percentage of replicate trees in which the associated sequences clustered together in the bootstrap test (200 replicates) are shown for branches with > 60% support. The evolutionary relationships among alleles of the three devil MHC-I genes are very difficult to resolve due to high sequence similarities, with the majority of the branches having low bootstrap values.



## Supplementary Data 7. Evidence of individual residues under selection

| Codon <sup>a</sup> | Selection <sup>b</sup> | Evidence <sup>c</sup> |      |     |     |
|--------------------|------------------------|-----------------------|------|-----|-----|
|                    |                        | MEME                  | IFEL | REL | EVF |
| 24                 | +                      | +                     | +    | +   | +   |
| 44                 |                        |                       |      | +   |     |
| 56                 |                        |                       |      |     | +   |
| 65                 |                        |                       |      | +   |     |
| 66                 | +                      | +                     |      |     | +   |
| 70                 |                        |                       |      | +   |     |
| 73                 | -                      |                       | -    | -   | -   |
| 76                 |                        |                       |      | +   |     |
| 77                 | +                      | +                     | +    | +   |     |
| 78                 |                        |                       |      | +   |     |
| 80                 | +                      | +                     | +    | +   | +   |
| 83                 | +                      | +                     | +    | +   | +   |
| 100                |                        |                       |      | +   |     |
| 102                |                        | +                     |      |     |     |
| 127                |                        |                       |      | +   |     |
| 156                | +                      | +                     | +    | +   | +   |
| 172                |                        |                       |      | +   |     |
| 192                |                        |                       |      | +   |     |
| 195                | -                      |                       | -    | -   | -   |
| 240                |                        |                       |      | -   |     |
| 241                | -                      |                       | -    | -   |     |
| 264                |                        |                       |      | +   |     |
| 269                |                        |                       |      | -   |     |

"+": positively selected sites

"-": negatively selected sites

<sup>a</sup> Codons correspond to amino acid sites starting from alpha 1 domain of the MHC-I molecules (i.e. signal peptide excluded).

<sup>b</sup> Sites that have evidence of selection inferred by more than one method are considered under selection.

<sup>c</sup> Statistical significance: one-tailed p-value  $\leq 0.05$  for MEME<sup>5</sup> and IFEL<sup>6</sup>, posterior probability  $\geq 0.95$  for REL<sup>6</sup> and EVF<sup>7</sup>.

## Supplementary Data 8. Tasmanian devil MHC-I haplotypes

### Supplementary Data 8a. List of inferred haplotypes

| Haplotype ID | MHC-I loci <sup>a</sup> |                |                |
|--------------|-------------------------|----------------|----------------|
|              | Saha-UA                 | Saha-UB        | Saha-UC        |
| hap_1        | x                       | UB*10:01:01:01 | UC*04:01:01:01 |
| hap_2        | UA*02:02:01:01          | UB*08:01:01:01 | UC*04:02:01:01 |
| hap_3        | x                       | UB*09:01:01:01 | UC*04:01:01:01 |
| hap_4        | UA*02:01:01:01          | UB*03:01:01:01 | UC*01:01:01:01 |
| hap_5        | UA*07:01:01:01          | UB*03:02:01:01 | UC*01:01:01:01 |
| hap_6        | UA*05:01:01:01          | UB*11:01:01:01 | UC*01:01:01:01 |
| hap_7        | UA*02:03:01:01          | UB*06:01:01:01 | UC*04:02:01:01 |
| hap_8        | UA*02:02:01:01          | UB*12:01:01:01 | UC*04:02:01:01 |
| hap_9        | UA*02:01:01:01          | UB*03:04:01:01 | UC*01:01:01:01 |
| hap_10       | UA*02:01:01:01          | UB*03:03:01:01 | UC*01:01:01:01 |
| hap_11       | x                       | UB*10:02:01:01 | UC*04:01:01:01 |
| hap_12       | x                       | x              | UC*01:01:01:01 |
| hap_13       | UA*02:03:02:01          | UB*06:02:01:01 | UC*04:03:01:01 |
| hap_14       | UA*02:01:01:01          | UB*03:05:01:01 | UC*01:02:01:01 |
| hap_15       | UA*02:01:01:01          | UB*03:01:01:02 | UC*01:03:01:01 |
| hap_16       | UA*02:01:01:01          | UB*03:01:01:01 | UC*01:04:01:01 |
| hap_17       | UA*02:01:01:01          | UB*03:01:01:03 | UC*01:01:01:01 |
| hap_18       | UA*05:02:01:01          | UB*03:03:01:01 | UC*01:01:01:01 |
| hap_19       | UA*02:04:01:01          | UB*03:05:01:01 | UC*01:02:01:01 |
| hap_20       | UA*05:03:01:01          | UB*11:01:01:01 | UC*01:01:01:01 |
| hap_21       | UA*01:01:01:01          | UB*06:03:01:01 | UC*04:03:01:01 |
| hap_22       | x                       | UB*04:01:01:01 | UC*04:01:01:01 |
| hap_23       | UA*02:02:01:01          | UB*08:02:01:01 | UC*04:02:01:01 |
| hap_24       | UA*02:01:01:01          | UB*03:06:01:01 | UC*01:01:01:01 |
| hap_25       | UA*02:01:01:01          | UB*03:07:01:01 | UC*01:01:01:01 |
| hap_26       | UA*01:02:01:01          | x              | x              |
| hap_27       | UA*02:03:01:01          | UB*06:04:01:01 | UC*04:02:01:01 |

|        |                |                |                |
|--------|----------------|----------------|----------------|
| hap_28 | UA*07:02:01:01 | UB*03:02:01:01 | UC*01:01:01:01 |
| hap_29 | UA*01:02:02:01 | UB*06:02:01:01 | UC*04:03:01:01 |
| hap_30 | x              | UB*10:02:01:01 | UC*04:04:01:01 |
| hap_31 | x              | UB*09:02:01:01 | UC*04:01:01:01 |
| hap_32 | UA*02:01:01:01 | UB*03:03:01:01 | UC*01:01:01:02 |
| hap_33 | UA*02:01:01:01 | UB*08:03:01:01 | UC*01:01:01:01 |
| hap_34 | UA*02:01:01:01 | UB*05:01:01:01 | UC*01:01:01:01 |
| hap_35 | UA*02:01:01:04 | UB*03:01:01:02 | UC*01:03:01:01 |
| hap_36 | UA*02:02:01:01 | UB*01:01:01:01 | UC*01:01:01:01 |
| hap_37 | x              | UB*09:01:01:01 | UC*04:02:01:01 |
| hap_38 | x              | UB*09:03:01:01 | UC*04:01:01:01 |
| hap_39 | UA*02:01:01:01 | UB*07:01:01:01 | UC*01:01:01:01 |
| hap_40 | UA*02:01:01:02 | UB*03:01:01:01 | UC*01:01:01:01 |
| hap_41 | UA*02:01:01:02 | UB*03:04:01:01 | UC*01:01:01:01 |
| hap_42 | UA*02:01:01:03 | UB*03:03:01:01 | UC*01:01:01:01 |
| hap_43 | UA*02:03:01:01 | UB*06:03:01:01 | UC*04:05:01:01 |
| hap_44 | UA*05:04:01:01 | UB*12:01:01:01 | UC*04:02:01:01 |
| hap_45 | UA*13:01:01:01 | UB*03:05:01:01 | UC*01:02:01:01 |
| hap_46 | UA*01:05:01:01 | UB*03:01:01:02 | UC*01:03:01:01 |
| hap_47 | UA*02:05:01:01 | UB*12:01:01:01 | UC*04:02:01:01 |
| hap_48 | UA*01:03:01:01 | UB*03:08:01:01 | UC*01:03:01:01 |
| hap_49 | UA*01:06:01:01 | UB*06:01:01:01 | UC*04:02:01:01 |
| hap_50 | UA*02:06:01:01 | UB*03:03:01:01 | UC*01:01:01:01 |

<sup>a</sup> The Tasmanian devil MHC has been found to contain genomic structural variants resulting in some haplotypes lacking certain MHC-I gene(s)<sup>1,8,9</sup>, which are indicated with “x”.

### Supplementary Data 8b. Confirmation of hap\_12

One of the two inferred haplotypes that contain only one copy of MHC-I gene, hap\_12, was observed in multiple devil subpopulations and was relatively common in a certain subpopulation (e.g. frequency = 0.15 in wukalina; see also Supplementary Data 9). To further confirm this haplotype, we sequenced the genome of one individual from wukalina (microchip number 982000365591975) which was found to have only one MHC allele (UC\*01:01:01:01) and was predicted to have two copies of hap\_12.

The sequencing library was constructed from genomic DNA using the KAPA HyperPlus Kit (Roche) and was sequenced on one lane in a NovaSeq SP 2x150bp run. Raw reads were trimmed using program Trimmomatic<sup>10</sup> v0.38 (LEADING:20 TRAILING:20 SLIDINGWINDOW:4:15 MINLEN:40) and data quality was checked with FastQC v0.11.8. Trimmed reads were aligned to the Tasmanian devil reference genome (accession number: GCF\_902635505.1) using BWA<sup>11</sup> v0.7.17 and PCR or optical read duplicates were removed using Picard<sup>12</sup> v2.21.7. A total of 934,975,126 reads (average read length 147.6 bp) were aligned to the genome. Reads aligned to the MHC-I region were visualised in IGV v2.5.2, as shown in the screenshot below.

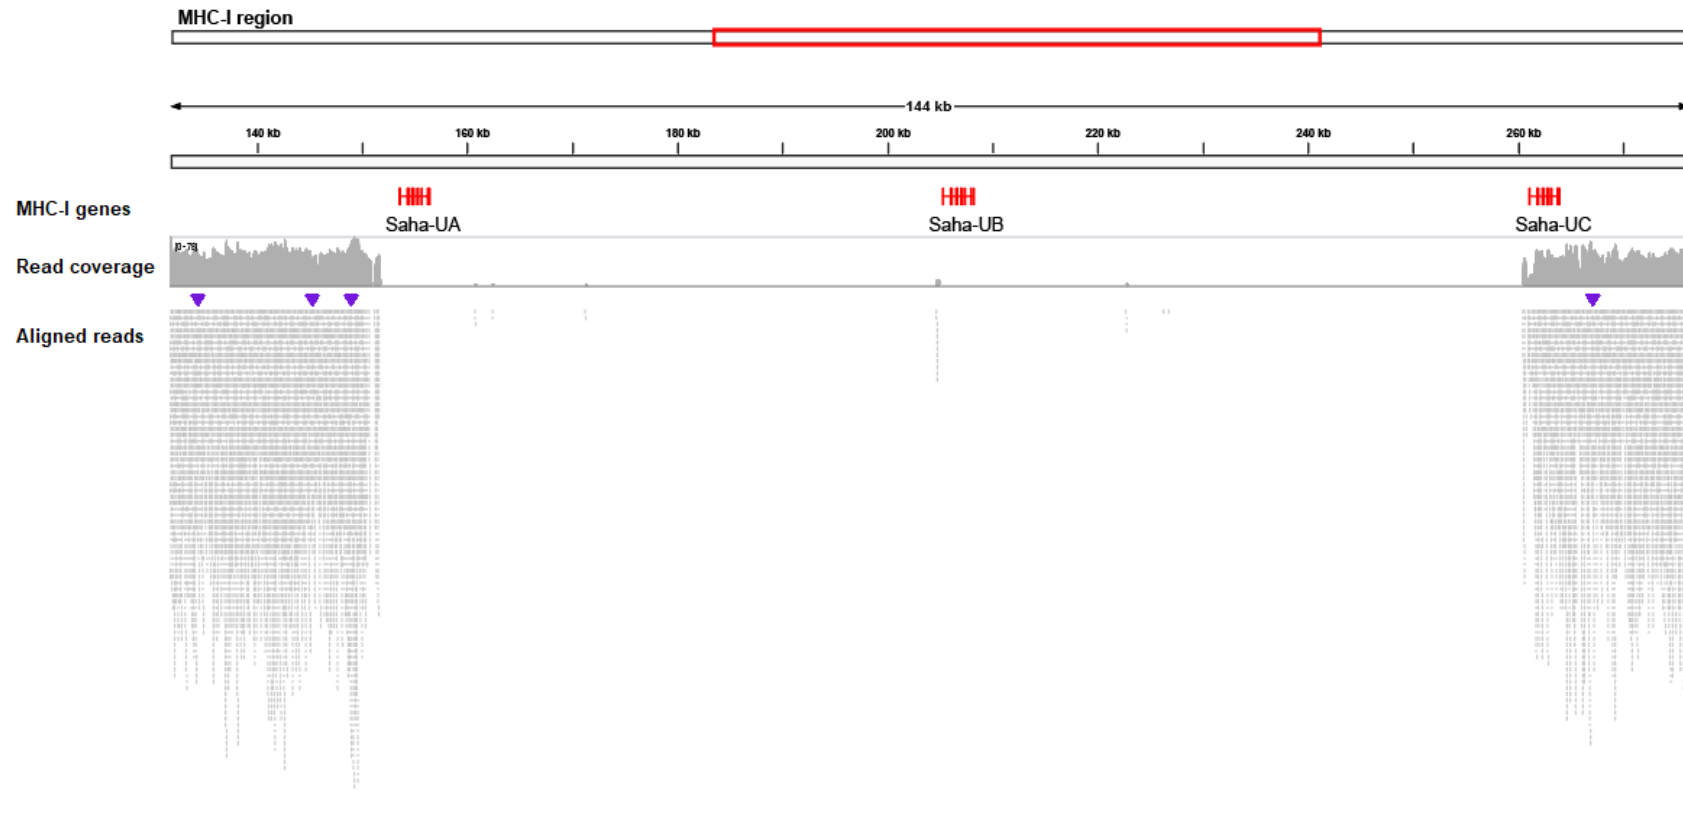

In this sequenced individual, two of the three MHC-I genes, *Saha-UA* and *Saha-UB*, are completely missing due to a deletion with the size of approximately 109kb within the genomic region. No single nucleotide variation was detected in gene *Saha-UC*, with read sequences matching the sequence of allele UC\*01:01:01:01. This data confirms that this individual has only one MHC-I allele in its genome, consistent with the genotyping and haplotyping results generated using our new MHC typing method.

**Supplementary Data 9. MHC-I haplotype, allele, and supertype frequencies in nine Tasmanian devil subpopulations**

|                       | Haplotype/<br>Allele/<br>Supertype | East         |               |                    |            |              |                | North<br>west | South<br>west | Insurance<br>population |
|-----------------------|------------------------------------|--------------|---------------|--------------------|------------|--------------|----------------|---------------|---------------|-------------------------|
|                       |                                    | wukal<br>ina | Stony<br>Head | Nara<br>wnta<br>pu | Bront<br>e | Buckl<br>and | Fento<br>nbury | Wool<br>north | South<br>west | Maria<br>Island         |
| Haplotype frequencies | hap_1                              | 0.250        | 0.167         | 0.342              | 0.167      | 0.026        | 0.235          | 0.179         | 0.000         | 0.102                   |
|                       | hap_2                              | 0.050        | 0.000         | 0.105              | 0.033      | 0.000        | 0.000          | 0.238         | 0.143         | 0.102                   |
|                       | hap_3                              | 0.175        | 0.000         | 0.000              | 0.033      | 0.079        | 0.177          | 0.048         | 0.000         | 0.159                   |
|                       | hap_4                              | 0.025        | 0.104         | 0.026              | 0.067      | 0.237        | 0.000          | 0.131         | 0.000         | 0.034                   |
|                       | hap_5                              | 0.025        | 0.000         | 0.053              | 0.267      | 0.184        | 0.235          | 0.048         | 0.000         | 0.000                   |
|                       | hap_6                              | 0.000        | 0.021         | 0.132              | 0.000      | 0.079        | 0.000          | 0.000         | 0.607         | 0.091                   |
|                       | hap_7                              | 0.050        | 0.104         | 0.000              | 0.067      | 0.211        | 0.000          | 0.000         | 0.000         | 0.023                   |
|                       | hap_8                              | 0.000        | 0.125         | 0.105              | 0.067      | 0.000        | 0.118          | 0.012         | 0.000         | 0.068                   |
|                       | hap_9                              | 0.000        | 0.000         | 0.000              | 0.000      | 0.000        | 0.000          | 0.191         | 0.000         | 0.057                   |
|                       | hap_10                             | 0.025        | 0.104         | 0.000              | 0.000      | 0.000        | 0.000          | 0.012         | 0.000         | 0.000                   |
|                       | hap_11                             | 0.000        | 0.000         | 0.105              | 0.100      | 0.000        | 0.059          | 0.000         | 0.036         | 0.068                   |
|                       | hap_12                             | 0.150        | 0.083         | 0.053              | 0.067      | 0.026        | 0.000          | 0.012         | 0.000         | 0.000                   |
|                       | hap_13                             | 0.025        | 0.042         | 0.000              | 0.000      | 0.000        | 0.059          | 0.000         | 0.000         | 0.000                   |
|                       | hap_14                             | 0.050        | 0.063         | 0.000              | 0.000      | 0.000        | 0.000          | 0.000         | 0.000         | 0.000                   |
|                       | hap_15                             | 0.000        | 0.000         | 0.000              | 0.100      | 0.053        | 0.088          | 0.000         | 0.071         | 0.000                   |
|                       | hap_16                             | 0.000        | 0.000         | 0.000              | 0.000      | 0.000        | 0.000          | 0.012         | 0.000         | 0.023                   |
|                       | hap_17                             | 0.000        | 0.063         | 0.000              | 0.000      | 0.000        | 0.000          | 0.000         | 0.000         | 0.000                   |
|                       | hap_18                             | 0.000        | 0.000         | 0.000              | 0.000      | 0.000        | 0.000          | 0.036         | 0.000         | 0.023                   |
|                       | hap_19                             | 0.000        | 0.042         | 0.000              | 0.000      | 0.000        | 0.000          | 0.000         | 0.000         | 0.000                   |
|                       | hap_20                             | 0.000        | 0.000         | 0.000              | 0.000      | 0.000        | 0.000          | 0.000         | 0.000         | 0.034                   |
|                       | hap_21                             | 0.000        | 0.000         | 0.000              | 0.000      | 0.000        | 0.000          | 0.000         | 0.000         | 0.057                   |
|                       | hap_22                             | 0.000        | 0.021         | 0.000              | 0.000      | 0.000        | 0.000          | 0.000         | 0.000         | 0.000                   |
|                       | hap_23                             | 0.000        | 0.000         | 0.000              | 0.000      | 0.000        | 0.000          | 0.012         | 0.000         | 0.046                   |
|                       | hap_24                             | 0.000        | 0.000         | 0.000              | 0.000      | 0.000        | 0.000          | 0.000         | 0.000         | 0.034                   |
|                       | hap_25                             | 0.000        | 0.021         | 0.000              | 0.000      | 0.000        | 0.000          | 0.000         | 0.000         | 0.000                   |
|                       | hap_26                             | 0.000        | 0.000         | 0.026              | 0.000      | 0.000        | 0.000          | 0.000         | 0.000         | 0.000                   |
|                       | hap_27                             | 0.000        | 0.000         | 0.000              | 0.000      | 0.000        | 0.000          | 0.012         | 0.000         | 0.011                   |
|                       | hap_28                             | 0.000        | 0.000         | 0.000              | 0.000      | 0.000        | 0.000          | 0.000         | 0.107         | 0.000                   |
|                       | hap_29                             | 0.075        | 0.000         | 0.000              | 0.000      | 0.000        | 0.000          | 0.000         | 0.000         | 0.000                   |
|                       | hap_30                             | 0.000        | 0.000         | 0.026              | 0.000      | 0.026        | 0.000          | 0.000         | 0.000         | 0.000                   |
|                       | hap_31                             | 0.000        | 0.000         | 0.000              | 0.000      | 0.000        | 0.000          | 0.024         | 0.000         | 0.000                   |
|                       | hap_32                             | 0.025        | 0.021         | 0.000              | 0.000      | 0.000        | 0.000          | 0.000         | 0.000         | 0.000                   |
|                       | hap_33                             | 0.000        | 0.000         | 0.000              | 0.000      | 0.000        | 0.000          | 0.000         | 0.000         | 0.023                   |
|                       | hap_34                             | 0.000        | 0.000         | 0.000              | 0.000      | 0.000        | 0.000          | 0.024         | 0.000         | 0.000                   |
|                       | hap_35                             | 0.000        | 0.000         | 0.000              | 0.000      | 0.053        | 0.000          | 0.000         | 0.000         | 0.000                   |
|                       | hap_36                             | 0.000        | 0.000         | 0.000              | 0.000      | 0.000        | 0.000          | 0.000         | 0.000         | 0.023                   |
|                       | hap_37                             | 0.000        | 0.000         | 0.000              | 0.000      | 0.000        | 0.000          | 0.000         | 0.036         | 0.000                   |
|                       | hap_38                             | 0.000        | 0.000         | 0.000              | 0.000      | 0.000        | 0.000          | 0.000         | 0.000         | 0.011                   |
|                       | hap_39                             | 0.000        | 0.000         | 0.000              | 0.000      | 0.000        | 0.000          | 0.000         | 0.000         | 0.000                   |
|                       | hap_40                             | 0.000        | 0.000         | 0.000              | 0.000      | 0.000        | 0.000          | 0.012         | 0.000         | 0.000                   |
|                       | hap_41                             | 0.000        | 0.000         | 0.000              | 0.000      | 0.000        | 0.000          | 0.000         | 0.000         | 0.011                   |
|                       | hap_42                             | 0.000        | 0.021         | 0.000              | 0.000      | 0.000        | 0.000          | 0.000         | 0.000         | 0.000                   |
|                       | hap_43                             | 0.000        | 0.000         | 0.000              | 0.000      | 0.026        | 0.000          | 0.000         | 0.000         | 0.000                   |

|                    |                |       |       |       |       |       |       |       |       |       |
|--------------------|----------------|-------|-------|-------|-------|-------|-------|-------|-------|-------|
|                    | hap_44         | 0.000 | 0.000 | 0.000 | 0.000 | 0.000 | 0.000 | 0.000 | 0.000 | 0.000 |
|                    | hap_45         | 0.025 | 0.000 | 0.000 | 0.000 | 0.000 | 0.000 | 0.000 | 0.000 | 0.000 |
|                    | hap_46         | 0.025 | 0.000 | 0.000 | 0.000 | 0.000 | 0.000 | 0.000 | 0.000 | 0.000 |
|                    | hap_47         | 0.000 | 0.000 | 0.000 | 0.033 | 0.000 | 0.000 | 0.000 | 0.000 | 0.000 |
|                    | hap_48         | 0.000 | 0.000 | 0.000 | 0.000 | 0.000 | 0.029 | 0.000 | 0.000 | 0.000 |
|                    | hap_49         | 0.000 | 0.000 | 0.026 | 0.000 | 0.000 | 0.000 | 0.000 | 0.000 | 0.000 |
|                    | hap_50         | 0.025 | 0.000 | 0.000 | 0.000 | 0.000 | 0.000 | 0.000 | 0.000 | 0.000 |
| Allele frequencies | UA*01:01:01:01 | 0.000 | 0.000 | 0.000 | 0.000 | 0.000 | 0.000 | 0.000 | 0.000 | 0.057 |
|                    | UA*01:02:01:01 | 0.000 | 0.000 | 0.026 | 0.000 | 0.000 | 0.000 | 0.000 | 0.000 | 0.000 |
|                    | UA*01:02:02:01 | 0.075 | 0.000 | 0.000 | 0.000 | 0.000 | 0.000 | 0.000 | 0.000 | 0.000 |
|                    | UA*01:03:01:01 | 0.000 | 0.000 | 0.000 | 0.000 | 0.000 | 0.029 | 0.000 | 0.000 | 0.000 |
|                    | UA*01:05:01:01 | 0.025 | 0.000 | 0.000 | 0.000 | 0.000 | 0.000 | 0.000 | 0.000 | 0.000 |
|                    | UA*01:06:01:01 | 0.000 | 0.000 | 0.026 | 0.000 | 0.000 | 0.000 | 0.000 | 0.000 | 0.000 |
|                    | UA*02:01:01:01 | 0.125 | 0.375 | 0.026 | 0.167 | 0.289 | 0.088 | 0.369 | 0.071 | 0.170 |
|                    | UA*02:01:01:02 | 0.000 | 0.000 | 0.000 | 0.000 | 0.000 | 0.000 | 0.012 | 0.000 | 0.011 |
|                    | UA*02:01:01:03 | 0.000 | 0.021 | 0.000 | 0.000 | 0.000 | 0.000 | 0.000 | 0.000 | 0.000 |
|                    | UA*02:01:01:04 | 0.000 | 0.000 | 0.000 | 0.000 | 0.053 | 0.000 | 0.000 | 0.000 | 0.000 |
|                    | UA*02:02:01:01 | 0.050 | 0.125 | 0.211 | 0.100 | 0.000 | 0.118 | 0.262 | 0.143 | 0.239 |
|                    | UA*02:03:01:01 | 0.050 | 0.104 | 0.000 | 0.067 | 0.237 | 0.000 | 0.012 | 0.000 | 0.034 |
|                    | UA*02:03:02:01 | 0.025 | 0.042 | 0.000 | 0.000 | 0.000 | 0.059 | 0.000 | 0.000 | 0.000 |
|                    | UA*02:04:01:01 | 0.000 | 0.042 | 0.000 | 0.000 | 0.000 | 0.000 | 0.000 | 0.000 | 0.000 |
|                    | UA*02:05:01:01 | 0.000 | 0.000 | 0.000 | 0.033 | 0.000 | 0.000 | 0.000 | 0.000 | 0.000 |
|                    | UA*02:06:01:01 | 0.025 | 0.000 | 0.000 | 0.000 | 0.000 | 0.000 | 0.000 | 0.000 | 0.000 |
|                    | UA*05:01:01:01 | 0.000 | 0.021 | 0.132 | 0.000 | 0.079 | 0.000 | 0.000 | 0.607 | 0.091 |
|                    | UA*05:02:01:01 | 0.000 | 0.000 | 0.000 | 0.000 | 0.000 | 0.000 | 0.036 | 0.000 | 0.023 |
|                    | UA*05:03:01:01 | 0.000 | 0.000 | 0.000 | 0.000 | 0.000 | 0.000 | 0.000 | 0.000 | 0.034 |
|                    | UA*05:04:01:01 | 0.000 | 0.000 | 0.000 | 0.000 | 0.000 | 0.000 | 0.000 | 0.000 | 0.000 |
|                    | UA*07:01:01:01 | 0.025 | 0.000 | 0.053 | 0.267 | 0.184 | 0.235 | 0.048 | 0.000 | 0.000 |
|                    | UA*07:02:01:01 | 0.000 | 0.000 | 0.000 | 0.000 | 0.000 | 0.000 | 0.000 | 0.107 | 0.000 |
|                    | UA*13:01:01:01 | 0.025 | 0.000 | 0.000 | 0.000 | 0.000 | 0.000 | 0.000 | 0.000 | 0.000 |
|                    | UB*01:01:01:01 | 0.000 | 0.000 | 0.000 | 0.000 | 0.000 | 0.000 | 0.000 | 0.000 | 0.023 |
|                    | UB*03:01:01:01 | 0.025 | 0.104 | 0.026 | 0.067 | 0.237 | 0.000 | 0.155 | 0.000 | 0.057 |
|                    | UB*03:01:01:02 | 0.025 | 0.000 | 0.000 | 0.100 | 0.105 | 0.088 | 0.000 | 0.071 | 0.000 |
|                    | UB*03:01:01:03 | 0.000 | 0.063 | 0.000 | 0.000 | 0.000 | 0.000 | 0.000 | 0.000 | 0.000 |
|                    | UB*03:02:01:01 | 0.025 | 0.000 | 0.053 | 0.267 | 0.184 | 0.235 | 0.048 | 0.107 | 0.000 |
|                    | UB*03:03:01:01 | 0.075 | 0.146 | 0.000 | 0.000 | 0.000 | 0.000 | 0.048 | 0.000 | 0.023 |
|                    | UB*03:04:01:01 | 0.000 | 0.000 | 0.000 | 0.000 | 0.000 | 0.000 | 0.190 | 0.000 | 0.068 |
|                    | UB*03:05:01:01 | 0.075 | 0.104 | 0.000 | 0.000 | 0.000 | 0.000 | 0.000 | 0.000 | 0.000 |
|                    | UB*03:06:01:01 | 0.000 | 0.000 | 0.000 | 0.000 | 0.000 | 0.000 | 0.000 | 0.000 | 0.034 |
|                    | UB*03:07:01:01 | 0.000 | 0.021 | 0.000 | 0.000 | 0.000 | 0.000 | 0.000 | 0.000 | 0.000 |
|                    | UB*03:08:01:01 | 0.000 | 0.000 | 0.000 | 0.000 | 0.000 | 0.029 | 0.000 | 0.000 | 0.000 |
|                    | UB*04:01:01:01 | 0.000 | 0.021 | 0.000 | 0.000 | 0.000 | 0.000 | 0.000 | 0.000 | 0.000 |
|                    | UB*05:01:01:01 | 0.000 | 0.000 | 0.000 | 0.000 | 0.000 | 0.000 | 0.024 | 0.000 | 0.000 |
|                    | UB*06:01:01:01 | 0.050 | 0.104 | 0.026 | 0.067 | 0.211 | 0.000 | 0.000 | 0.000 | 0.023 |
|                    | UB*06:02:01:01 | 0.100 | 0.042 | 0.000 | 0.000 | 0.000 | 0.059 | 0.000 | 0.000 | 0.000 |
|                    | UB*06:03:01:01 | 0.000 | 0.000 | 0.000 | 0.000 | 0.026 | 0.000 | 0.000 | 0.000 | 0.057 |
|                    | UB*06:04:01:01 | 0.000 | 0.000 | 0.000 | 0.000 | 0.000 | 0.000 | 0.012 | 0.000 | 0.011 |
| UB*07:01:01:01     | 0.000          | 0.000 | 0.000 | 0.000 | 0.000 | 0.000 | 0.000 | 0.000 | 0.000 |       |
| UB*08:01:01:01     | 0.050          | 0.000 | 0.105 | 0.033 | 0.000 | 0.000 | 0.238 | 0.143 | 0.102 |       |
| UB*08:02:01:01     | 0.000          | 0.000 | 0.000 | 0.000 | 0.000 | 0.000 | 0.012 | 0.000 | 0.045 |       |



## References

- 1 Siddle, H. V., Marzec, J., Cheng, Y., Jones, M. & Belov, K. MHC gene copy number variation in Tasmanian devils: implications for the spread of a contagious cancer. *Proceedings of the Royal Society B: Biological Sciences* **277**, 2001-2006, doi:10.1098/rspb.2009.2362 (2010).
- 2 Haas, B. J. *et al.* Chimeric 16S rRNA sequence formation and detection in Sanger and 454-pyrosequenced PCR amplicons. **21**, 494-504, doi:10.1101/gr.112730.110 (2011).
- 3 Whelan, S. & Goldman, N. A general empirical model of protein evolution derived from multiple protein families using a maximum-likelihood approach. *Mol Biol Evol* **18**, doi:10.1093/oxfordjournals.molbev.a003851 (2001).
- 4 Kumar, S., Stecher, G., Li, M., Knyaz, C. & Tamura, K. MEGA X: Molecular Evolutionary Genetics Analysis across Computing Platforms. *Mol Biol Evol* **35**, 1547-1549, doi:10.1093/molbev/msy096 %J Molecular Biology and Evolution (2018).
- 5 Murrell, B. *et al.* Detecting Individual Sites Subject to Episodic Diversifying Selection. *PLoS Genet* **8**, e1002764, doi:10.1371/journal.pgen.1002764 (2012).
- 6 Kosakovsky Pond, S. L. & Frost, S. D. W. Not So Different After All: A Comparison of Methods for Detecting Amino Acid Sites Under Selection. *Mol Biol Evol* **22**, 1208-1222, doi:10.1093/molbev/msi105 (2005).
- 7 Kosakovsky Pond, S. L., Scheffler, K., Gravenor, M. B., Poon, A. F. Y. & Frost, S. D. W. Evolutionary Fingerprinting of Genes. *Mol Biol Evol* **27**, 520-536, doi:10.1093/molbev/msp260 %J Molecular Biology and Evolution (2009).
- 8 Cheng, Y. *et al.* Antigen-presenting genes and genomic copy number variations in the Tasmanian devil (*Sarcophilus harrisi*). *BMC Genomics* **13**, 87 (2012).
- 9 Lane, A. *et al.* New Insights into the Role of MHC Diversity in Devil Facial Tumour Disease. *PLoS One* **7**, e36955, doi:10.1371/journal.pone.0036955 (2012).
- 10 Bolger, A. M., Lohse, M. & Usadel, B. Trimmomatic: a flexible trimmer for Illumina sequence data. *Bioinformatics* **30**, 2114-2120, doi:10.1093/bioinformatics/btu170 %J Bioinformatics (2014).
- 11 Li, H. & Durbin, R. Fast and accurate short read alignment with Burrows–Wheeler transform. *Bioinformatics* **25**, 1754-1760, doi:10.1093/bioinformatics/btp324 %J Bioinformatics (2009).
- 12 Broad Institute. Picard Toolkit. <http://broadinstitute.github.io/picard/>. (2019).
